# Supplementary material for: Low Crude Protein Diet Affects the Intestinal Microbiome and Metabolome Differently in Barrows and Gilts
Source: Front Microbiol. 2021 Aug 20;12:717727. doi: 10.3389/fmicb.2021.717727 (PMC8417834; doi:10.3389/fmicb.2021.717727)
Supplement: Supplementary Table 5 — All KEGG pathways enriched between GHP and GLP. [file Table_5.xlsx]

## Sheet: GLP.vs.GHP_neg_kegg_enrichment
MapID	MapTitle	Pvalue	x	y	n	N	EnrichDirect	MetaIDs	kegg_cpd_id
map02060	Phosphotransferase system (PTS)	0.00427246	3	5	16	193	Over	Com_1425_neg Com_776_neg Com_857_neg	cpd:C00072,cpd:C00072,cpd:C00275
map00053	Ascorbate and aldarate metabolism	0.00647668	2	2	16	193	Over	Com_1425_neg Com_776_neg	cpd:C00072,cpd:C00072
map04066	HIF-1 signaling pathway	0.00647668	2	2	16	193	Over	Com_1425_neg Com_776_neg	cpd:C00072,cpd:C00072
map05310	Asthma	0.00647668	2	2	16	193	Over	Com_3822_neg Com_5841_neg	cpd:C00388,cpd:C04598
map00480	Glutathione metabolism	0.0351597	2	4	16	193	Over	Com_1425_neg Com_776_neg	cpd:C00072,cpd:C00072
map04080	Neuroactive ligand-receptor interaction	0.0557512	2	5	16	193	Over	Com_3822_neg Com_5841_neg	cpd:C00388,cpd:C04598
map00051	Fructose and mannose metabolism	0.0829016	1	1	16	193	Over	Com_857_neg	cpd:C00275
map00565	Ether lipid metabolism	0.0829016	1	1	16	193	Over	Com_5841_neg	cpd:C04598
map00904	Diterpenoid biosynthesis	0.0829016	1	1	16	193	Over	Com_7485_neg	cpd:C11864
map04142	Lysosome	0.0829016	1	1	16	193	Over	Com_857_neg	cpd:C00275
map04721	Synaptic vesicle cycle	0.0829016	1	1	16	193	Over	Com_3822_neg	cpd:C00388
map04971	Gastric acid secretion	0.0829016	1	1	16	193	Over	Com_3822_neg	cpd:C00388
map07227	Histamine H2/H3 receptor agonists/antagonists	0.0829016	1	1	16	193	Over	Com_3822_neg	cpd:C00388
map04977	Vitamin digestion and absorption	0.106021	2	7	16	193	Over	Com_1425_neg Com_776_neg	cpd:C00072,cpd:C00072
map00240	Pyrimidine metabolism	0.134553	2	8	16	193	Over	Com_276_neg Com_3082_neg	cpd:C00299,cpd:C00380
map00364	Fluorobenzoate degradation	0.159326	1	2	16	193	Over	Com_5945_neg	cpd:C16480
map00520	Amino sugar and nucleotide sugar metabolism	0.159326	1	2	16	193	Over	Com_857_neg	cpd:C00275
map00522	Biosynthesis of 12-, 14- and 16-membered macrolides	0.159326	1	2	16	193	Over	Com_6391_neg	cpd:C11990
map04611	Platelet activation	0.159326	1	2	16	193	Over	Com_3962_neg	cpd:C05956
map04664	Fc epsilon RI signaling pathway	0.159326	1	2	16	193	Over	Com_3822_neg	cpd:C00388
map07034	Eicosanoids	0.159326	1	2	16	193	Over	Com_3962_neg	cpd:C05956
map00270	Cysteine and methionine metabolism	0.229749	1	3	16	193	Over	Com_6699_neg	cpd:C19787
map00590	Arachidonic acid metabolism	0.229749	1	3	16	193	Over	Com_3962_neg	cpd:C05956
map04726	Serotonergic synapse	0.229749	1	3	16	193	Over	Com_3962_neg	cpd:C05956
map04750	Inflammatory mediator regulation of TRP channels	0.229749	1	3	16	193	Over	Com_3822_neg	cpd:C00388
map04979	Cholesterol metabolism	0.229749	1	3	16	193	Over	Com_4667_neg	cpd:C05466
map01100	Metabolic pathways	0.247858	10	88	16	193	Over	Com_1425_neg Com_276_neg Com_3082_neg Com_3822_neg Com_3962_neg Com_5841_neg Com_5945_neg Com_6699_neg Com_776_neg Com_857_neg	cpd:C00072,cpd:C00299,cpd:C00380,cpd:C00388,cpd:C05956,cpd:C04598,cpd:C16480,cpd:C19787,cpd:C00072,cpd:C00275
map04976	Bile secretion	0.260809	2	12	16	193	Over	Com_4667_neg Com_6247_neg	cpd:C05466,cpd:C11158
map04075	Plant hormone signal transduction	0.294613	1	4	16	193	Over	Com_7485_neg	cpd:C11864
map00121	Secondary bile acid biosynthesis	0.354328	1	5	16	193	Over	Com_4667_neg	cpd:C05466
map00340	Histidine metabolism	0.354328	1	5	16	193	Over	Com_3822_neg	cpd:C00388
map00120	Primary bile acid biosynthesis	0.459822	1	7	16	193	Over	Com_4667_neg	cpd:C05466
map00627	Aminobenzoate degradation	0.459822	1	7	16	193	Over	Com_1458_neg	cpd:C00870
map01065	Biosynthesis of alkaloids derived from histidine and purine	0.459822	1	7	16	193	Over	Com_3822_neg	cpd:C00388
map04974	Protein digestion and absorption	0.506289	1	8	16	193	Over	Com_3822_neg	cpd:C00388
map01110	Biosynthesis of secondary metabolites	0.565325	5	50	16	193	Over	Com_1425_neg Com_3822_neg Com_7485_neg Com_776_neg Com_857_neg	cpd:C00072,cpd:C00388,cpd:C11864,cpd:C00072,cpd:C00275
map00360	Phenylalanine metabolism	0.588206	1	10	16	193	Over	Com_4920_neg	cpd:C05853
map01120	Microbial metabolism in diverse environments	0.744448	4	39	16	193	Over	Com_1425_neg Com_1458_neg Com_5945_neg Com_776_neg	cpd:C00072,cpd:C00870,cpd:C16480,cpd:C00072
map01220	Degradation of aromatic compounds	1	1	11	16	193	Over	Com_5945_neg	cpd:C16480

## Sheet: GLP.vs.GHP_pos_kegg_enrichment
MapID	MapTitle	Pvalue	x	y	n	N	EnrichDirect	MetaIDs	kegg_cpd_id
map04750	Inflammatory mediator regulation of TRP channels	0.00340362	3	5	25	333	Over	Com_1201_pos Com_3171_pos Com_6177_pos	cpd:C00388,cpd:C00903,cpd:C00219
map04664	Fc epsilon RI signaling pathway	0.00542711	2	2	25	333	Over	Com_1201_pos Com_6177_pos	cpd:C00388,cpd:C00219
map00591	Linoleic acid metabolism	0.0155271	2	3	25	333	Over	Com_15282_pos Com_6177_pos	cpd:C03242,cpd:C00219
map01220	Degradation of aromatic compounds	0.0243847	4	16	25	333	Over	Com_10574_pos Com_134_pos Com_3204_pos Com_6210_pos	cpd:C08060,cpd:C07113,cpd:C05629,cpd:C00829
map01065	Biosynthesis of alkaloids derived from histidine and purine	0.0470996	2	5	25	333	Over	Com_10315_pos Com_1201_pos	cpd:C16696,cpd:C00388
map00980	Metabolism of xenobiotics by cytochrome P450	0.0674156	2	6	25	333	Over	Com_15627_pos Com_6210_pos	cpd:C14788,cpd:C00829
map00500	Starch and sucrose metabolism	0.0750751	1	1	25	333	Over	Com_19480_pos	cpd:C00718
map00590	Arachidonic acid metabolism	0.0750751	1	1	25	333	Over	Com_6177_pos	cpd:C00219
map00642	Ethylbenzene degradation	0.0750751	1	1	25	333	Over	Com_134_pos	cpd:C07113
map00740	Riboflavin metabolism	0.0750751	1	1	25	333	Over	Com_3878_pos	cpd:C01727
map00830	Retinol metabolism	0.0750751	1	1	25	333	Over	Com_6396_pos	cpd:C00473
map04217	Necroptosis	0.0750751	1	1	25	333	Over	Com_6177_pos	cpd:C00219
map04611	Platelet activation	0.0750751	1	1	25	333	Over	Com_6177_pos	cpd:C00219
map04730	Long-term depression	0.0750751	1	1	25	333	Over	Com_6177_pos	cpd:C00219
map04912	GnRH signaling pathway	0.0750751	1	1	25	333	Over	Com_6177_pos	cpd:C00219
map04921	Oxytocin signaling pathway	0.0750751	1	1	25	333	Over	Com_6177_pos	cpd:C00219
map07227	Histamine H2/H3 receptor agonists/antagonists	0.0750751	1	1	25	333	Over	Com_1201_pos	cpd:C00388
map01040	Biosynthesis of unsaturated fatty acids	0.114656	2	8	25	333	Over	Com_15282_pos Com_6177_pos	cpd:C03242,cpd:C00219
map04216	Ferroptosis	0.144723	1	2	25	333	Over	Com_6177_pos	cpd:C00219
map04270	Vascular smooth muscle contraction	0.144723	1	2	25	333	Over	Com_6177_pos	cpd:C00219
map04666	Fc gamma R-mediated phagocytosis	0.144723	1	2	25	333	Over	Com_6177_pos	cpd:C00219
map04745	Phototransduction - fly	0.144723	1	2	25	333	Over	Com_6177_pos	cpd:C00219
map04971	Gastric acid secretion	0.144723	1	2	25	333	Over	Com_1201_pos	cpd:C00388
map05310	Asthma	0.144723	1	2	25	333	Over	Com_1201_pos	cpd:C00388
map00332	Carbapenem biosynthesis	0.209321	1	3	25	333	Over	Com_15592_pos	cpd:C17369
map00402	Benzoxazinoid biosynthesis	0.209321	1	3	25	333	Over	Com_359_pos	cpd:C00463
map00621	Dioxin degradation	0.209321	1	3	25	333	Over	Com_10574_pos	cpd:C08060
map00900	Terpenoid backbone biosynthesis	0.209321	1	3	25	333	Over	Com_4622_pos	cpd:C04145
map04723	Retrograde endocannabinoid signaling	0.209321	1	3	25	333	Over	Com_6177_pos	cpd:C00219
map04726	Serotonergic synapse	0.209321	1	3	25	333	Over	Com_6177_pos	cpd:C00219
map04923	Regulation of lipolysis in adipocytes	0.209321	1	3	25	333	Over	Com_6177_pos	cpd:C00219
map04925	Aldosterone synthesis and secretion	0.209321	1	3	25	333	Over	Com_6177_pos	cpd:C00219
map07114	Naphthalene family	0.209321	1	3	25	333	Over	Com_6210_pos	cpd:C00829
map07226	Progesterone, androgen and estrogen receptor agonists/antagonists	0.209321	1	3	25	333	Over	Com_11052_pos	cpd:C05141
map04974	Protein digestion and absorption	0.254057	2	13	25	333	Over	Com_1201_pos Com_359_pos	cpd:C00388,cpd:C00463
map00254	Aflatoxin biosynthesis	0.269221	1	4	25	333	Over	Com_7942_pos	cpd:C00961
map00626	Naphthalene degradation	0.269221	1	4	25	333	Over	Com_6210_pos	cpd:C00829
map04913	Ovarian steroidogenesis	0.269221	1	4	25	333	Over	Com_6177_pos	cpd:C00219
map01100	Metabolic pathways	0.296217	12	121	25	333	Over	Com_10574_pos Com_11052_pos Com_1201_pos Com_15282_pos Com_19480_pos Com_3171_pos Com_359_pos Com_3763_pos Com_420_pos Com_6177_pos Com_6210_pos Com_6396_pos	cpd:C08060,cpd:C05141,cpd:C00388,cpd:C03242,cpd:C00718,cpd:C00903,cpd:C00463,cpd:C00847,cpd:C00380,cpd:C00219,cpd:C00829,cpd:C00473
map00140	Steroid hormone biosynthesis	0.312594	2	15	25	333	Over	Com_11052_pos Com_6858_pos	cpd:C05141,cpd:C05504
map00750	Vitamin B6 metabolism	0.324751	1	5	25	333	Over	Com_3763_pos	cpd:C00847
map00943	Isoflavonoid biosynthesis	0.376218	1	6	25	333	Over	Com_4630_pos	cpd:C14536
map01062	Biosynthesis of terpenoids and steroids	0.376218	1	6	25	333	Over	Com_3615_pos	cpd:C08797
map04721	Synaptic vesicle cycle	0.376218	1	6	25	333	Over	Com_1201_pos	cpd:C00388
map01110	Biosynthesis of secondary metabolites	0.419485	8	78	25	333	Over	Com_10315_pos Com_10709_pos Com_1201_pos Com_19480_pos Com_3171_pos Com_359_pos Com_4622_pos Com_4630_pos	cpd:C16696,cpd:C09421,cpd:C00388,cpd:C00718,cpd:C00903,cpd:C00463,cpd:C04145,cpd:C14536
map00130	Ubiquinone and other terpenoid-quinone biosynthesis	0.423908	1	7	25	333	Over	Com_4622_pos	cpd:C04145
map00240	Pyrimidine metabolism	0.423908	1	7	25	333	Over	Com_420_pos	cpd:C00380
map00340	Histidine metabolism	0.423908	1	7	25	333	Over	Com_1201_pos	cpd:C00388
map00400	Phenylalanine, tyrosine and tryptophan biosynthesis	0.423908	1	7	25	333	Over	Com_359_pos	cpd:C00463
map00950	Isoquinoline alkaloid biosynthesis	0.423908	1	7	25	333	Over	Com_10709_pos	cpd:C09421
map00330	Arginine and proline metabolism	0.509003	1	9	25	333	Over	Com_2496_pos	cpd:C03440
map00360	Phenylalanine metabolism	0.509003	1	9	25	333	Over	Com_3204_pos	cpd:C05629
map04977	Vitamin digestion and absorption	0.509003	1	9	25	333	Over	Com_6396_pos	cpd:C00473
map01120	Microbial metabolism in diverse environments	0.581036	5	55	25	333	Over	Com_10574_pos Com_134_pos Com_3204_pos Com_3763_pos Com_6210_pos	cpd:C08060,cpd:C07113,cpd:C05629,cpd:C00847,cpd:C00829
map00940	Phenylpropanoid biosynthesis	1	1	12	25	333	Over	Com_3171_pos	cpd:C00903
map00380	Tryptophan metabolism	1	1	13	25	333	Over	Com_359_pos	cpd:C00463
